# Supplementary material for: Unicellular versus Filamentous: The Glacial Alga Ancylonema alaskana comb. et stat. nov. and Its Ecophysiological Relatedness to Ancylonema nordenskioeldii (Zygnematophyceae, Streptophyta)
Source: MDPI journal article supplement (doi:10.3390/microorganisms9051103), 2021-05-20
Supplement: s1 [file s1]

## Supplementary Information

### Unicellular versus Filamentous:

the Glacial Alga *Ancylnema alaskana* comb. et stat. nov.

and Its Ecophysiological Relatedness to *Ancylnema nordenskioeldii* (Zygnematophyceae, Streptophyta)

Lenka Procházková, Tomáš Řezanka, Linda Nedbalová and Daniel Remias

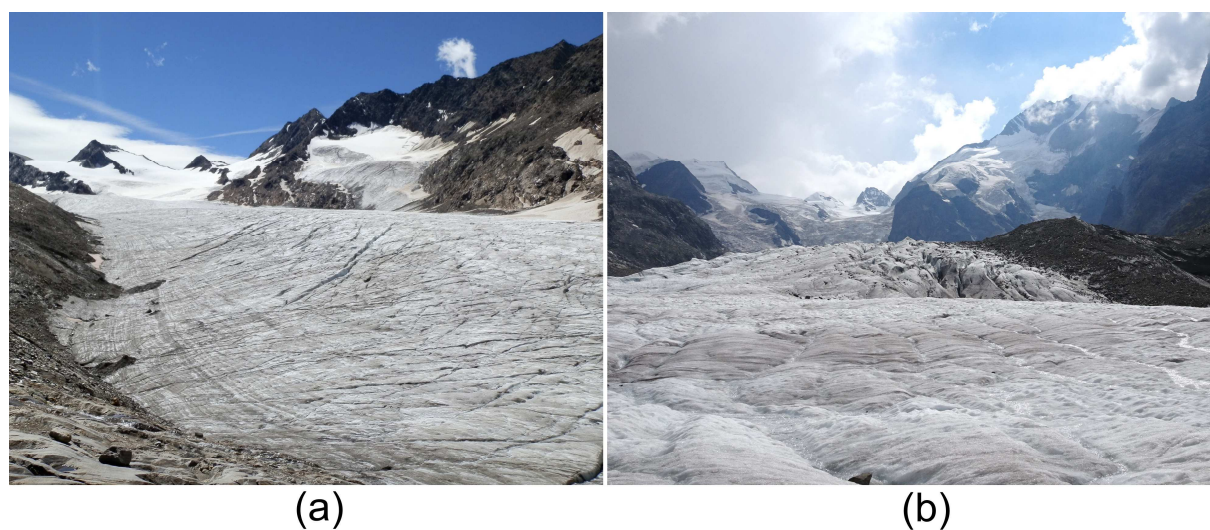

**Figure S1.** Overview of the sampling sites with blooms of glacial algae: (a) Gurgler Ferner, a glacier in Ötztal Valley, Tyrol, Austria (30 Aug 2017, sample WP167), (b) Morteratsch Glacier in Engadin, Graubünden, Switzerland (22 Aug 2018, sample WP211).

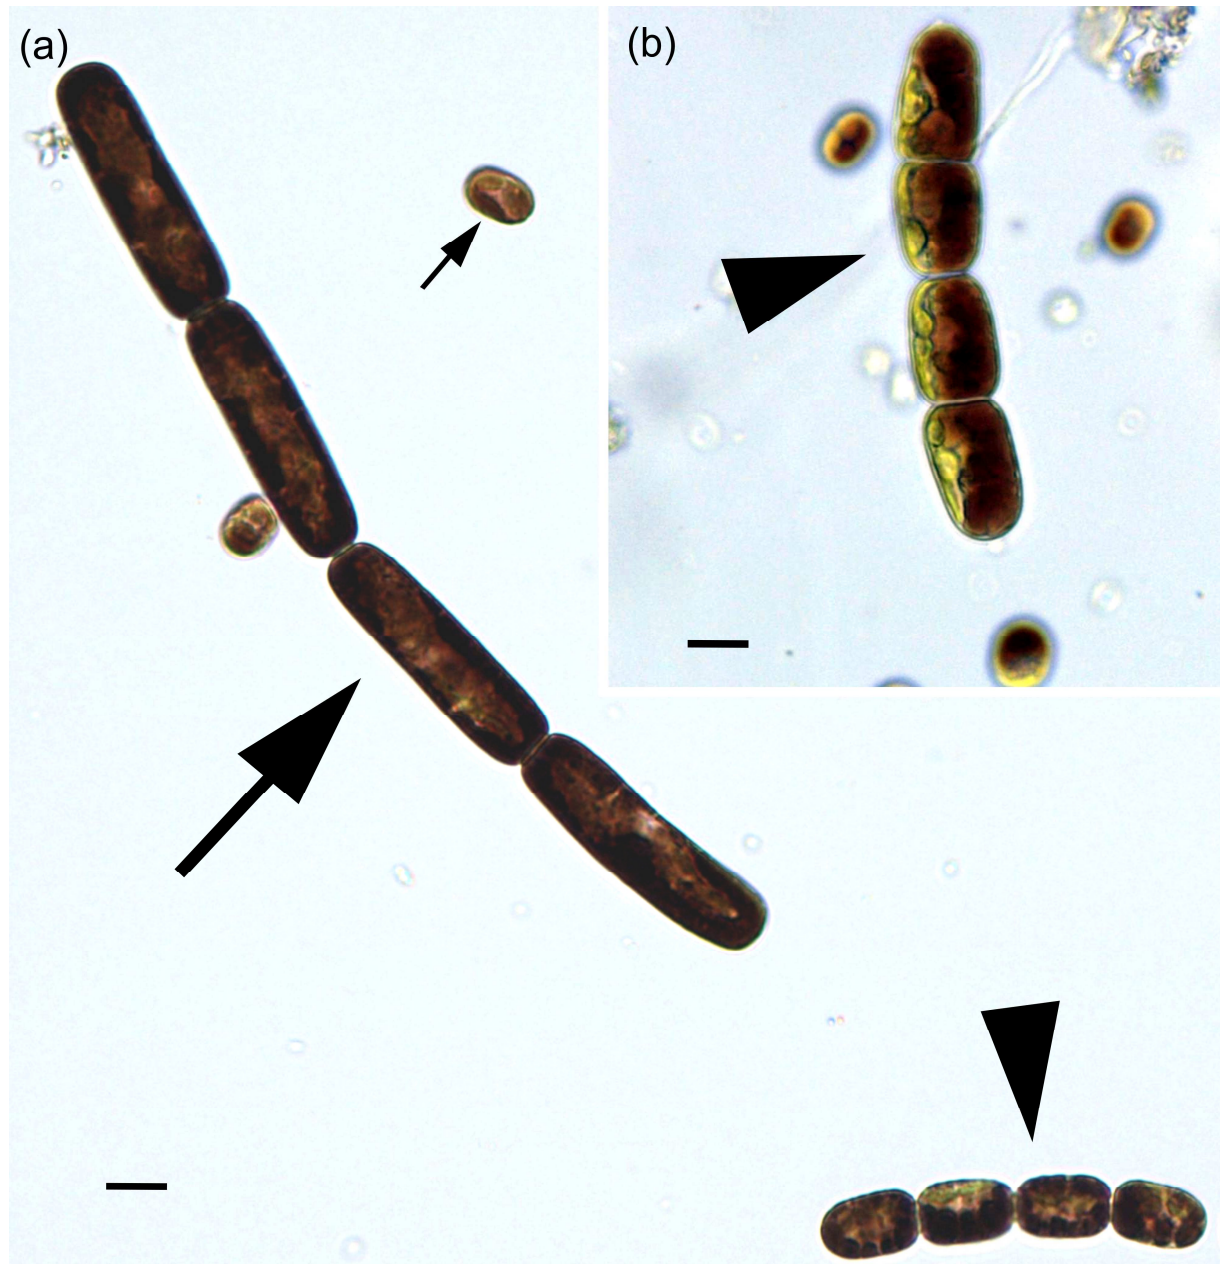

**Figure S2.** Light micrographs of the Morteratsch Glacier field sample (WP249) showing (a) *Ancydonema alaskana* (small arrow; former *Mesotaenium berggrenii* var. *alaskanum*) and *Ancydonema nordenskioldii* (large arrow). (b) Putative *Ancydonema nordenskioldii* var. *chodatii* (arrowhead). Scale = 10  $\mu$ m.

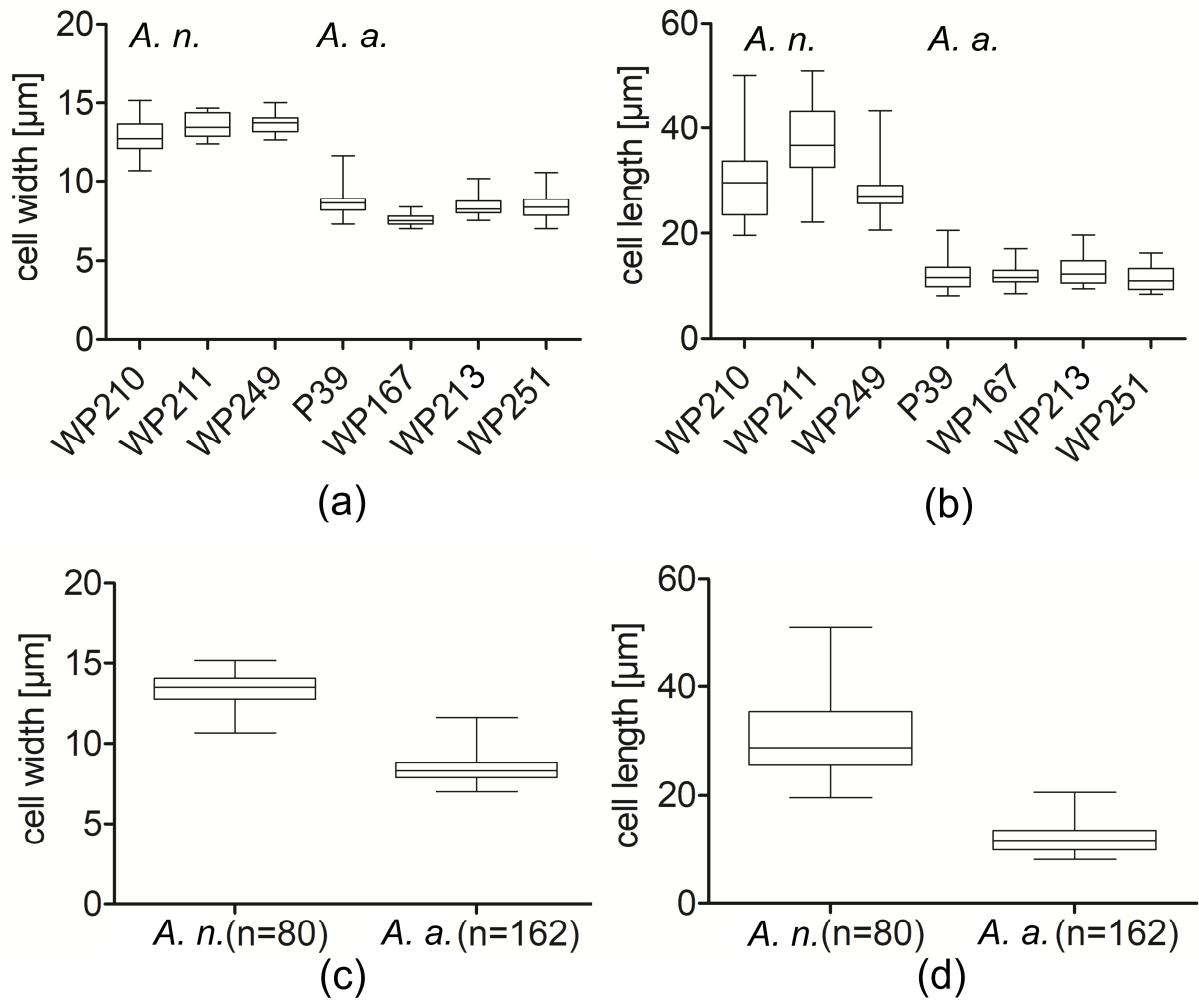

**Figure S3.** Comparison of (a, c) cell widths and (b, d) cell lengths between *Ancydonema nordenskioldii* (*A. n.*; WP210, n=19; WP211, n=28; WP249, n=33) and *Ancydonema alaskana* (*A. a.*; P39, n=83; WP167, n=30; WP213, n=22; WP251, n=27). Details of sample locations are listed in Table 2.



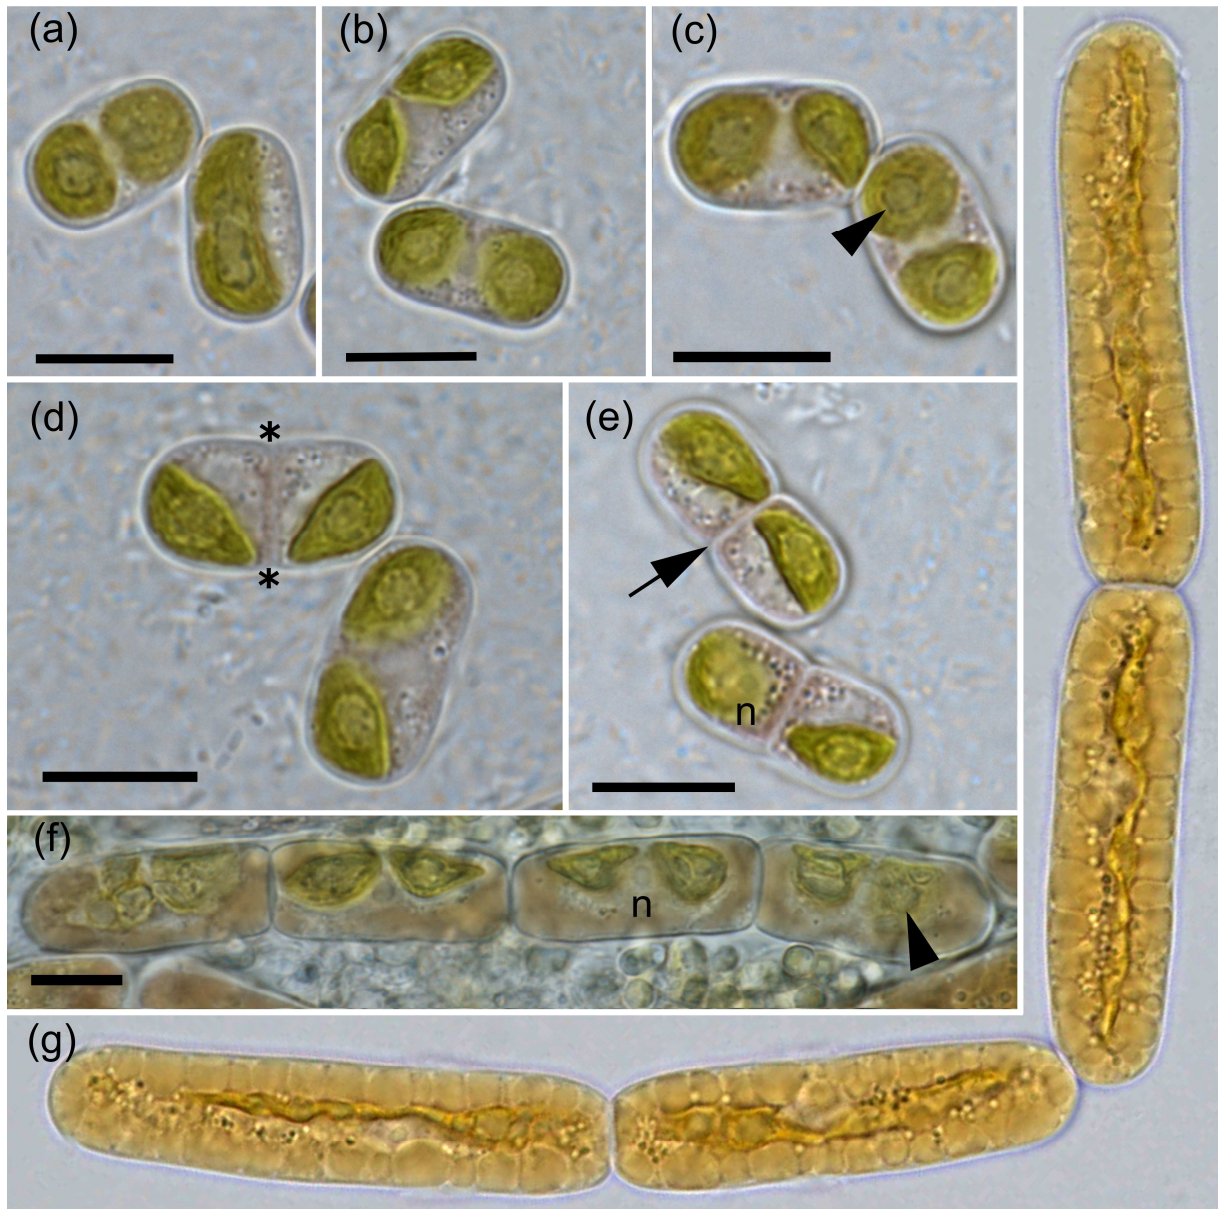

**Figure S4.** Light micrographs of aged field samples kept for a prolonged period under laboratorial conditions, showing (a-e) *Ancydonema alaskana* WP251 and (f, g) *Ancydonema nordenskioldii* WP211. *Ancydonema alaskana* with gone vacuolar pigmentation: (a) prior division of the chloroplast and the pyrenoid (right cell); (b) just after the chloroplasts division; (c) arrowhead indicates the circle pyrenoid; (d) asterisks point to formation of the new wall (septum); (e) separation of the two young cells (i.e. a chain fragmentation), the fully developed septum (large arrow), single nucleus (n; behind the chloroplast). *Ancydonema nordenskioldii* with altered vacuolar, ochre pigmentation: (f) Arrowhead indicates the circle pyrenoid. Actively dividing cells resulting in temporal presence of the two parietal partly lobed chloroplasts per each cell in filament, central translucent area shows the nucleus (n); (g) an old filament with a single chloroplast per cell and striking vacuolization. Scale: 10 μm.



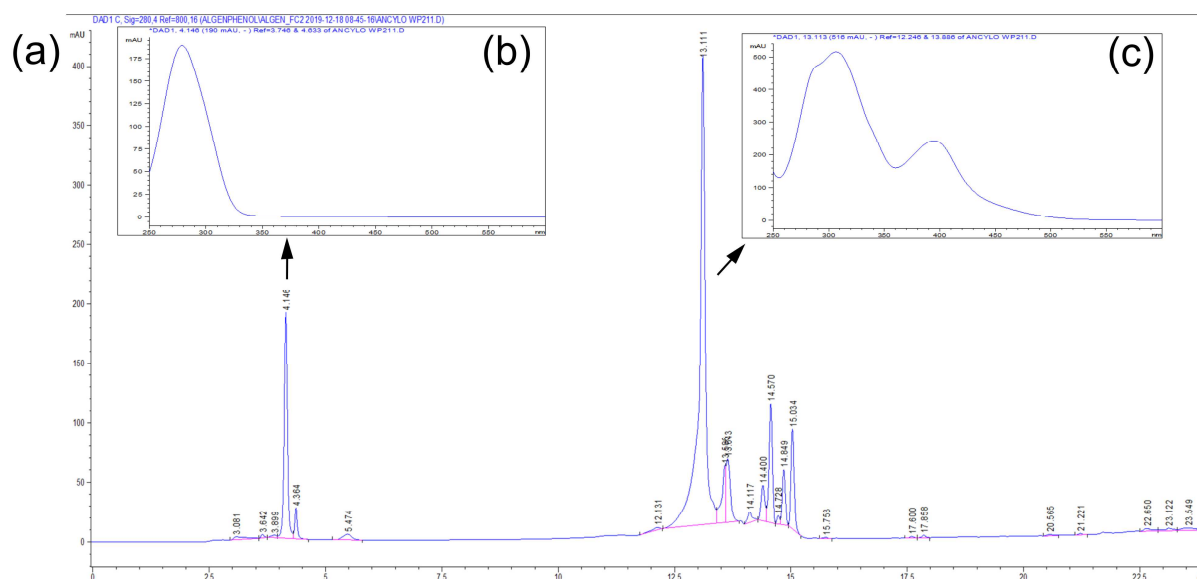

**Figure S5.** (a) HPLC-chromatogram (at 280 nm) of a 20% ethanolic extract of *Ancydonema nordenskiöldii* field sample from Morteratsch Glacier, acquired with a diode array detector. Inserts: HPLC online spectra (b) second major peak (likely gallic acid glycoside) and (c) first major peak (likely purpurogallin carboxylic acid-6-O- $\beta$ -D-glucopyranoside).

**Table S1.** List of primers used for amplification of 18S rRNA gene (18S) and *rbcL* markers (F, forward; R, reverse).

| Primer          | Marker      | Direction | Sequence                 | Reference |
|-----------------|-------------|-----------|--------------------------|-----------|
| 18F2            | 18S         | F         | AACCTGGTTGATCCTGCCAGT    | [1]       |
| 18R2            | 18S         | R         | TGATCCTTCTGCAGGTTACCTACG | [1]       |
| P2              | 18S         | F         | CTGGTTGATTCTGCCAGT       | [2]       |
| P4              | 18S         | R         | TGATCCTTCYGCAGGTTAC      | [3]       |
| MaGo1F          | <i>rbcL</i> | F         | ATGTCACCACAAACNGAAAC     | [4]       |
| <i>rbcL</i> 7R  | <i>rbcL</i> | R         | AAATAAATACCACGGCTACG     | [5]       |
| <i>rbcL</i> KF2 | <i>rbcL</i> | F         | ACTTACTACACTCCTGATTATGA  | [6]       |
| R3              | <i>rbcL</i> | R         | ATRAAACGGTCTCTCCAACGCAT  | [7]       |

## References

1. Katana, A.; Kwiatowski, J.; Spalik, K.; Zakryś, B.; Szalacha, E.; Szymańska, H. Phylogenetic position of *Koliella* (Chlorophyta) as inferred from nuclear and chloroplast small subunit rDNA. *J. Phycol.* **2001**, *37*, 443–51. <https://doi.org/10.1046/j.1529-8817.2001.037003443.x>
2. De Wever, A.; Leliaert, F.; Verleyen, E.; Vanormelingen, P.; Van der Gucht, K.; Hodgson, D.A.; Sabbe, K.; Vyverman, W. Hidden levels of phylodiversity in Antarctic green algae: further evidence for the existence of glacial refugia. *P. Roy. Soc. B.-Biol. Sci.* **2009**, *276*, 3591–9. DOI:10.1098/rspb.2009.0994.
3. Moon-van der Staay, S.Y.; van der Staay, G.W.M.; Guillou, L.; Vaulot, D.; Claustre, H.; Medlin, L.K. Abundance and diversity of prymnesiophytes in the picoplankton community from the equatorial Pacific Ocean inferred from 18S rDNA sequences. *Limnol. Oceanogr.* **2000**, *45*, 98–109. <https://doi.org/10.4319/lo.2000.45.1.0098>
4. Gontcharov, A.A.; Marin, B.; Melkonian, M. Are Combined Analyses Better Than Single Gene Phylogenies? A Case Study Using SSU rDNA and *rbcL* Sequence Comparisons in the Zygnematophyceae (Streptophyta). *Mol. Biol. Evol.* **2004**, *21*, 612–24. 10.1093/molbev/msh052
5. Hoham, R.W.; Tomas A. Bonome.; Christopher W. Martin.; James H. Leebens-Mack. A combined 18S rDNA and *rbcL* phylogenetic analysis of *Chloromonas* and *Chlamydomonas* (Chlorophyceae, Volvocales) emphasizing snow and other cold-temperature habitats. *J. Phycol.* **2002**, *38*, 1051–64. DOI:10.1046/j.1529-8817.2002.t01-1-01227.x.
6. Škaloud, P.; Rindi, F. Ecological differentiation of cryptic species within an asexual protist morphospecies: A case study of filamentous green alga *Klebsormidium* (Streptophyta). *J. Eukar. Microbiol.* **2013**, *60*, 350–62. DOI: 10.1111/jeu.12040
7. Matsuzaki, R.; Kawai-Toyooka, H.; Hara, Y.; Nozaki, H. Revisiting the taxonomic significance of aplanozygote morphologies of two cosmopolitan snow species of the genus *Chloromonas* (Volvocales, Chlorophyceae). *Phycologia*. **2015**, *54*, 491–502. <https://doi.org/10.2216/15-33.1>

**Table S2.** List of 346 molecular species of lipids identified by shotgun analysis for *Ancydonema nordenskiöldii* (WP211) and *Ancydonema alaskana* (WP167).

| <b>Compound Name</b> | <b><i>Ancydonema alaskana</i></b> | <b><i>Ancydonema nordenskiöldii</i></b> |
|----------------------|-----------------------------------|-----------------------------------------|
| Cers (d18:0, c16:0)  | 0.007                             | 0.008                                   |
| Cers (d18:1, c16:0)  | 0.006                             | 0.006                                   |
| Cers (t18:0, c16:0)  | 0.012                             | 0.007                                   |
| Cers (t18:0, c22:0)  | 0.003                             | 0.003                                   |
| Cers (t18:0, c24:0)  | 0.015                             | 0.015                                   |
| Cers (t18:0, c24:1)  | 0.003                             | 0.003                                   |
| Cers (t18:0, c26:0)  | 0.006                             | 0.008                                   |
| Cers (t18:0, c26:1)  | 0.001                             | 0.001                                   |
| Cers (t18:1, c16:0)  | 0.028                             | 0.018                                   |
| Cers (t18:1, c20:0)  | 0.001                             | 0.001                                   |
| Cers (t18:1, c22:0)  | 0.009                             | 0.007                                   |
| Cers (t18:1, c24:0)  | 0.039                             | 0.033                                   |
| Cers (t18:1, c24:1)  | 0.006                             | 0.006                                   |
| Cers (t18:1, c26:0)  | 0.027                             | 0.03                                    |
| Cers (t18:1, c26:1)  | 0.005                             | 0.005                                   |
| DAG (32:1)           | 0.154                             | 0.126                                   |
| DAG (32:2)           | 0.158                             | 0.102                                   |
| DAG (32:3)           | 0.135                             | 0.064                                   |
| DAG (32:4)           | 0.088                             | 0.085                                   |
| DAG (32:5)           | 0.092                             | 0.104                                   |
| DAG (32:6)           | 0.157                             | 0.177                                   |
| DAG (32:7)           | 0.036                             | 0.048                                   |
| DAG (32:8)           | 0.034                             | 0.044                                   |
| DAG (34:1)           | 0.029                             | 0.034                                   |
| DAG (34:2)           | 0.254                             | 0.237                                   |
| DAG (34:3)           | 0.372                             | 0.372                                   |
| DAG (34:4)           | 0.012                             | 0.011                                   |
| DAG (34:5)           | 0.006                             | 0.007                                   |
| DAG (34:6)           | 0.128                             | 0.161                                   |
| DAG (34:7)           | 0.061                             | 0.098                                   |
| DAG (34:8)           | 0.114                             | 0.176                                   |
| DAG (36:1)           | 0.004                             | 0.003                                   |
| DAG (36:2)           | 0.015                             | 0.015                                   |
| DAG (36:3)           | 0.017                             | 0.018                                   |
| DAG (36:4)           | 0.108                             | 0.118                                   |
| DAG (36:5)           | 0.354                             | 0.403                                   |
| DAG (36:6)           | 0.269                             | 0.329                                   |
| DAG (36:7)           | 0.041                             | 0.104                                   |
| DAG (36:8)           | 0.037                             | 0.03                                    |
| DAG (38:6)           | 0.07                              | 0.113                                   |
| DAG (38:7)           | 0.129                             | 0.173                                   |
| DAG (40:5)           | 0.14                              | 0.179                                   |
| DAG (40:8)           | 0.197                             | 0.231                                   |



|                        |       |       |
|------------------------|-------|-------|
| DGDG(34:1)             | 0.017 | 0.01  |
| DGDG(34:2)             | 0.044 | 0.018 |
| DGDG(34:3)             | 0.229 | 0.112 |
| DGDG(34:4)             | 0.01  | 0.005 |
| DGDG(34:5)             | 0.027 | 0.012 |
| DGDG(34:6)             | 0.079 | 0.036 |
| DGDG(36:1)             | 0.000 | 0.001 |
| DGDG(36:2)             | 0.001 | 0.001 |
| DGDG(36:3)             | 0.013 | 0.01  |
| DGDG(36:4)             | 0.023 | 0.012 |
| DGDG(36:5)             | 0.056 | 0.025 |
| DGDG(36:6)             | 0.993 | 0.505 |
| DGDG(38:3)             | 0.001 | 0.000 |
| DGDG(38:4)             | 0.001 | 0.001 |
| DGDG(38:5)             | 0.003 | 0.001 |
| DGDG(38:6)             | 0.025 | 0.024 |
| GIPCs (d18:0, h16:0)   | 0.072 | 0.104 |
| GIPCs (d18:0, h18:0)   | 0.002 | 0.003 |
| GIPCs (d18:0, h20:0)   | 0.009 | 0.01  |
| GIPCs (d18:0, h22:0)   | 0.012 | 0.024 |
| GIPCs (d18:0, h22:1)   | 0.003 | 0.000 |
| GIPCs (d18:0, h24:0)   | 0.432 | 0.501 |
| GIPCs (d18:0, h24:1)   | 0.094 | 0.086 |
| GIPCs (d18:0, h26:0)   | 0.067 | 0.063 |
| GIPCs (d18:1, h16:0)   | 0.266 | 0.172 |
| GIPCs (d18:1, h18:0)   | 0.004 | 0.004 |
| GIPCs (d18:1, h20:0)   | 0.099 | 0.05  |
| GIPCs (d18:1, h22:0)   | 0.138 | 0.065 |
| GIPCs (t18:0, h16:0)   | 0.059 | 0.076 |
| GIPCs (t18:0, h18:0)   | 0.005 | 0.003 |
| GIPCs (t18:0, h20:0)   | 0.013 | 0.018 |
| GIPCs (t18:0, h22:0)   | 0.597 | 0.479 |
| GIPCs (t18:0, h22:1)   | 0.03  | 0.005 |
| GIPCs (t18:0, h24:0)   | 0.436 | 0.567 |
| GIPCs (t18:0, h24:1)   | 0.339 | 0.389 |
| GIPCs (t18:0, h26:0)   | 0.204 | 0.168 |
| GIPCs (t18:1, h16:0)   | 0.317 | 0.185 |
| GIPCs (t18:1, h18:0)   | 0.017 | 0.008 |
| GIPCs (t18:1, h20:0)   | 0.116 | 0.063 |
| GIPCs (t18:1, h20:1)   | 0.003 | 0.002 |
| GIPCs (t18:1, h22:0)   | 1.805 | 1.382 |
| GIPCs (t18:1, h22:1)   | 0.047 | 0.028 |
| GIPCs (t18:1, h24:0)   | 4.629 | 3.958 |
| GIPCs (t18:1, h24:1)   | 3.354 | 2.628 |
| GIPCs (t18:1, h26:0)   | 1.678 | 1.356 |
| GIPCs (t18:1, h26:1)   | 0.539 | 0.401 |
| GlcCers (d18:0, h16:0) | 0.007 | 0.007 |

|                        |       |       |
|------------------------|-------|-------|
| GlcCers (d18:1, h16:0) | 1.374 | 1.368 |
| GlcCers (d18:1, h20:0) | 0.005 | 0.000 |
| GlcCers (d18:1, h22:0) | 0.056 | 0.077 |
| GlcCers (d18:1, h24:0) | 0.122 | 0.261 |
| GlcCers (d18:1, h24:1) | 0.074 | 0.069 |
| GlcCers (d18:1, h26:0) | 0.029 | 0.057 |
| GlcCers (d18:2, h16:0) | 0.03  | 0.051 |
| GlcCers (t18:0, h16:0) | 0.011 | 0.019 |
| GlcCers (t18:0, h18:0) | 0.017 | 0.035 |
| GlcCers (t18:0, h20:0) | 0.003 | 0.008 |
| GlcCers (t18:0, h22:0) | 0.013 | 0.023 |
| GlcCers (t18:0, h24:0) | 0.005 | 0.041 |
| GlcCers (t18:0, h24:1) | 0.091 | 0.18  |
| GlcCers (t18:0, h26:0) | 0.01  | 0.026 |
| GlcCers (t18:0, h26:1) | 0.014 | 0.022 |
| GlcCers (t18:1, h16:0) | 0.384 | 0.47  |
| GlcCers (t18:1, h18:0) | 0.086 | 0.112 |
| GlcCers (t18:1, h20:0) | 0.091 | 0.103 |
| GlcCers (t18:1, h20:1) | 0.001 | 0.006 |
| GlcCers (t18:1, h22:0) | 0.774 | 1.210 |
| GlcCers (t18:1, h22:1) | 0.073 | 0.105 |
| GlcCers (t18:1, h24:0) | 1.864 | 3.707 |
| GlcCers (t18:1, h24:1) | 2.270 | 3.988 |
| GlcCers (t18:1, h26:0) | 0.831 | 1.455 |
| GlcCers (t18:1, h26:1) | 0.404 | 0.626 |
| hCers (d18:0, h16:0)   | 0.055 | 0.1   |
| hCers (d18:1, h16:0)   | 0.019 | 0.019 |
| hCers (d18:1, h24:0)   | 0.001 | 0.001 |
| hCers (d18:1, h26:0)   | 0.001 | 0.001 |
| hCers (t18:0, h16:0)   | 0.007 | 0.015 |
| hCers (t18:0, h22:0)   | 0.009 | 0.01  |
| hCers (t18:0, h24:0)   | 0.032 | 0.037 |
| hCers (t18:0, h24:1)   | 0.012 | 0.013 |
| hCers (t18:0, h26:0)   | 0.012 | 0.017 |
| hCers (t18:0, h26:1)   | 0.002 | 0.002 |
| hCers (t18:1, h16:0)   | 0.091 | 0.068 |
| hCers (t18:1, h18:0)   | 0.003 | 0.002 |
| hCers (t18:1, h20:0)   | 0.006 | 0.004 |
| hCers (t18:1, h22:0)   | 0.075 | 0.06  |
| hCers (t18:1, h22:1)   | 0.003 | 0.003 |
| hCers (t18:1, h24:0)   | 0.215 | 0.22  |
| hCers (t18:1, h24:1)   | 0.123 | 0.111 |
| hCers (t18:1, h26:0)   | 0.113 | 0.108 |
| hCers (t18:1, h26:1)   | 0.028 | 0.024 |
| LCBs (d18:0)           | 0.032 | 0.018 |
| LCBs (d18:1)           | 0.000 | 0.003 |
| LCBs (t18:0)           | 0.091 | 0.146 |

|                |       |       |
|----------------|-------|-------|
| LCBs (t18:0-P) | 0.001 | 0.001 |
| LCBs (t18:1)   | 0.031 | 0.053 |
| LCBs (t18:1-P) | 0.001 | 0.001 |
| LysoPC(16:0)   | 0.001 | 0.001 |
| LysoPC(18:2)   | 0.002 | 0.002 |
| LysoPC(18:3)   | 0.001 | 0.001 |
| LysoPE(16:0)   | 0.001 | 0.001 |
| LysoPE(18:2)   | 0.002 | 0.002 |
| LysoPE(18:3)   | 0.001 | 0.001 |
| LysoPG(16:0)   | 0.001 | 0.000 |
| LysoPG(16:1)   | 0.003 | 0.000 |
| LysoPG(18:1)   | 0.001 | 0.001 |
| LysoPG(18:2)   | 0.001 | 0.000 |
| LysoPG(18:3)   | 0.008 | 0.004 |
| MGDG(34:1)     | 0.013 | 0.012 |
| MGDG(34:2)     | 0.031 | 0.012 |
| MGDG(34:3)     | 0.118 | 0.073 |
| MGDG(34:4)     | 0.161 | 0.078 |
| MGDG(34:5)     | 0.956 | 0.459 |
| MGDG(34:6)     | 5.567 | 2.850 |
| MGDG(36:1)     | 0.002 | 0.000 |
| MGDG(36:2)     | 0.002 | 0.000 |
| MGDG(36:3)     | 0.006 | 0.004 |
| MGDG(36:4)     | 0.055 | 0.028 |
| MGDG(36:5)     | 0.178 | 0.076 |
| MGDG(36:6)     | 1.754 | 1.006 |
| MGDG(38:4)     | 0.001 | 0.000 |
| MGDG(38:5)     | 0.003 | 0.002 |
| MGDG(38:6)     | 0.007 | 0.007 |
| PA(34:1)       | 0.000 | 0.002 |
| PA(34:2)       | 0.006 | 0.012 |
| PA(34:3)       | 0.005 | 0.009 |
| PA(34:4)       | 0.000 | 0.001 |
| PA(36:2)       | 0.001 | 0.002 |
| PA(36:3)       | 0.001 | 0.002 |
| PA(36:4)       | 0.005 | 0.009 |
| PA(36:5)       | 0.003 | 0.008 |
| PA(36:6)       | 0.001 | 0.002 |
| PC(34:1)       | 0.047 | 0.023 |
| PC(34:2)       | 0.441 | 0.255 |
| PC(34:3)       | 0.361 | 0.253 |
| PC(34:4)       | 0.014 | 0.008 |
| PC(36:1)       | 0.005 | 0.003 |
| PC(36:2)       | 0.062 | 0.047 |
| PC(36:3)       | 0.138 | 0.09  |
| PC(36:4)       | 0.44  | 0.229 |
| PC(36:5)       | 0.503 | 0.295 |



|          |       |       |
|----------|-------|-------|
| PC(36:6) | 0.218 | 0.137 |
| PC(38:2) | 0.007 | 0.004 |
| PC(38:3) | 0.006 | 0.004 |
| PC(38:4) | 0.008 | 0.004 |
| PC(38:5) | 0.005 | 0.003 |
| PC(38:6) | 0.002 | 0.001 |
| PC(40:2) | 0.002 | 0.001 |
| PC(40:3) | 0.005 | 0.002 |
| PC(40:4) | 0.005 | 0.003 |
| PE(32:1) | 0.002 | 0.001 |
| PE(32:2) | 0.003 | 0.002 |
| PE(32:3) | 0.002 | 0.001 |
| PE(34:1) | 0.008 | 0.005 |
| PE(34:2) | 0.437 | 0.219 |
| PE(34:3) | 0.255 | 0.168 |
| PE(34:4) | 0.003 | 0.003 |
| PE(36:1) | 0.001 | 0.000 |
| PE(36:2) | 0.029 | 0.023 |
| PE(36:3) | 0.057 | 0.04  |
| PE(36:4) | 0.218 | 0.152 |
| PE(36:5) | 0.211 | 0.145 |
| PE(36:6) | 0.061 | 0.043 |
| PE(38:3) | 0.004 | 0.003 |
| PE(38:4) | 0.004 | 0.002 |
| PE(38:5) | 0.003 | 0.002 |
| PE(38:6) | 0.003 | 0.002 |
| PE(40:2) | 0.01  | 0.008 |
| PE(40:3) | 0.002 | 0.003 |
| PE(42:2) | 0.009 | 0.012 |
| PE(42:3) | 0.008 | 0.011 |
| PE(42:4) | 0.002 | 0.003 |
| PG(32:0) | 0.064 | 0.061 |
| PG(32:1) | 0.125 | 0.089 |
| PG(34:0) | 0.014 | 0.016 |
| PG(34:1) | 0.158 | 0.121 |
| PG(34:2) | 0.296 | 0.19  |
| PG(34:3) | 0.558 | 0.443 |
| PG(34:4) | 1.040 | 0.566 |
| PG(36:1) | 0.002 | 0.001 |
| PG(36:2) | 0.003 | 0.002 |
| PG(36:3) | 0.004 | 0.006 |
| PG(36:4) | 0.004 | 0.003 |
| PG(36:5) | 0.005 | 0.005 |
| PG(36:6) | 0.006 | 0.003 |
| PI(32:0) | 0.000 | 0.005 |
| PI(32:1) | 0.005 | 0.007 |
| PI(32:2) | 0.002 | 0.004 |

|             |       |       |
|-------------|-------|-------|
| PI(32:3)    | 0.007 | 0.01  |
| PI(34:1)    | 0.004 | 0.004 |
| PI(34:2)    | 0.207 | 0.154 |
| PI(34:3)    | 0.189 | 0.165 |
| PI(34:4)    | 0.004 | 0.005 |
| PI(36:2)    | 0.011 | 0.007 |
| PI(36:3)    | 0.013 | 0.008 |
| PI(36:4)    | 0.009 | 0.006 |
| PI(36:5)    | 0.012 | 0.009 |
| PI(36:6)    | 0.014 | 0.007 |
| PS(34:2)    | 0.022 | 0.009 |
| PS(34:3)    | 0.022 | 0.01  |
| PS(36:2)    | 0.008 | 0.004 |
| PS(36:3)    | 0.009 | 0.006 |
| PS(36:4)    | 0.003 | 0.002 |
| PS(36:5)    | 0.003 | 0.001 |
| PS(36:6)    | 0.001 | 0.001 |
| PS(38:2)    | 0.01  | 0.006 |
| PS(38:3)    | 0.01  | 0.005 |
| PS(38:4)    | 0.001 | 0.001 |
| PS(38:6)    | 0.001 | 0.000 |
| PS(40:2)    | 0.013 | 0.01  |
| PS(40:3)    | 0.011 | 0.008 |
| PS(42:2)    | 0.02  | 0.02  |
| PS(42:3)    | 0.023 | 0.022 |
| PS(42:4)    | 0.005 | 0.005 |
| PS(44:2)    | 0.001 | 0.001 |
| PS(44:3)    | 0.000 | 0.001 |
| SQDG (32:0) | 2.412 | 2.463 |
| SQDG (34:1) | 0.455 | 0.456 |
| SQDG (34:2) | 2.517 | 2.384 |
| SQDG (34:3) | 1.903 | 2.595 |
| TAG (42:0)  | 0.136 | 0.059 |
| TAG (44:0)  | 0.154 | 0.063 |
| TAG (44:1)  | 0.19  | 0.082 |
| TAG (44:2)  | 0.09  | 0.034 |
| TAG (46:0)  | 0.181 | 0.092 |
| TAG (46:1)  | 0.28  | 0.112 |
| TAG (46:2)  | 0.127 | 0.097 |
| TAG (46:3)  | 0.109 | 0.073 |
| TAG (46:4)  | 0.271 | 0.02  |
| TAG (48:0)  | 1.286 | 1.279 |
| TAG (48:1)  | 0.369 | 0.331 |
| TAG (48:10) | 0.233 | 0.387 |
| TAG (48:11) | 0.201 | 0.276 |
| TAG (48:12) | 0.276 | 0.381 |
| TAG (48:2)  | 0.247 | 0.228 |

|             |       |       |
|-------------|-------|-------|
| TAG (48:3)  | 0.841 | 0.562 |
| TAG (48:4)  | 0.425 | 0.499 |
| TAG (48:5)  | 0.355 | 0.446 |
| TAG (48:6)  | 0.353 | 0.399 |
| TAG (48:7)  | 0.275 | 0.32  |
| TAG (48:8)  | 0.19  | 0.337 |
| TAG (50:0)  | 0.168 | 0.147 |
| TAG (50:1)  | 0.446 | 0.41  |
| TAG (50:10) | 0.283 | 0.243 |
| TAG (50:11) | 0.235 | 0.16  |
| TAG (50:12) | 0.208 | 0.122 |
| TAG (50:2)  | 0.353 | 0.314 |
| TAG (50:3)  | 2.276 | 2.502 |
| TAG (50:4)  | 3.180 | 3.471 |
| TAG (50:5)  | 3.753 | 4.017 |
| TAG (50:6)  | 0.454 | 0.617 |
| TAG (50:7)  | 4.176 | 4.809 |
| TAG (50:8)  | 0.371 | 0.345 |
| TAG (50:9)  | 0.497 | 0.532 |
| TAG (52:1)  | 0.095 | 0.102 |
| TAG (52:10) | 0.444 | 0.495 |
| TAG (52:11) | 0.28  | 0.426 |
| TAG (52:12) | 0.262 | 0.321 |
| TAG (52:2)  | 0.67  | 0.643 |
| TAG (52:3)  | 0.766 | 0.73  |
| TAG (52:4)  | 0.897 | 0.83  |
| TAG (52:5)  | 2.467 | 2.465 |
| TAG (52:6)  | 2.440 | 2.411 |
| TAG (52:7)  | 0.554 | 0.384 |
| TAG (52:8)  | 1.919 | 2.105 |
| TAG (52:9)  | 0.463 | 0.403 |
| TAG (54:1)  | 0.452 | 0.218 |
| TAG (54:10) | 0.285 | 0.345 |
| TAG (54:11) | 0.222 | 0.314 |
| TAG (54:12) | 0.181 | 0.32  |
| TAG (54:2)  | 0.062 | 0.228 |
| TAG (54:3)  | 1.058 | 0.737 |
| TAG (54:4)  | 0.572 | 0.427 |
| TAG (54:5)  | 0.535 | 0.437 |
| TAG (54:6)  | 0.631 | 0.822 |
| TAG (54:7)  | 1.866 | 2.437 |
| TAG (54:8)  | 3.605 | 4.635 |
| TAG (54:9)  | 2.918 | 3.848 |
| TAG (56:0)  | 0.072 | 0.061 |
| TAG (56:1)  | 0.049 | 0.047 |
| TAG (56:10) | 0.039 | 0.069 |
| TAG (56:11) | 0.025 | 0.05  |



|             |       |       |
|-------------|-------|-------|
| TAG (56:12) | 0.039 | 0.079 |
| TAG (56:13) | 0.024 | 0.04  |
| TAG (56:3)  | 0.06  | 0.049 |
| TAG (56:4)  | 0.045 | 0.037 |
| TAG (56:5)  | 0.049 | 0.011 |
| TAG (56:6)  | 0.016 | 0.041 |
| TAG (56:7)  | 0.024 | 0.033 |
| TAG (56:8)  | 0.035 | 0.044 |
| TAG (56:9)  | 0.022 | 0.04  |
| TAG (58:1)  | 0.042 | 0.033 |
| TAG (58:10) | 0.023 | 0.044 |
| TAG (58:11) | 0.018 | 0.032 |
| TAG (58:12) | 0.013 | 0.023 |
| TAG (58:13) | 0.018 | 0.037 |
| TAG (58:14) | 0.026 | 0.045 |
| TAG (58:2)  | 0.028 | 0.024 |
| TAG (58:4)  | 0.02  | 0.015 |
| TAG (60:12) | 0.025 | 0.043 |
| TAG (60:13) | 0.026 | 0.056 |
| TAG (60:14) | 0.022 | 0.044 |
| TAG (60:15) | 0.013 | 0.023 |

---

**Table S3.** List of glaciers in the Austrian Alps with occurrence of *Ancylonema alaskana*. No filaments of *Ancylonema nordenskiöldii* were found in all cases.

| Glacier name      | Land               |
|-------------------|--------------------|
| Gurgler Ferner    | Tyrol, Austria     |
| Rettenbachferner  | Tyrol, Austria     |
| Tiefenbach Ferner | Tyrol, Austria     |
| Daunkogelferner   | Tyrol, Austria     |
| Vernagtferner     | Tyrol, Austria     |
| Winnebach Ferner  | Tyrol, Austria     |
| Rotmoosferner     | Tyrol, Austria     |
| Langtaler Ferner  | Tyrol, Austria     |
| Pasterze          | Carinthia, Austria |
